# Supplementary material for: Analysis of the cancer genome atlas (TCGA) database identifies an inverse relationship between interleukin-13 receptor α1 and α2 gene expression and poor prognosis and drug resistance in subjects with glioblastoma multiforme
Source: Springer Nature journal article supplement (doi:10.1007/s11060-017-2680-9), 2017-11-22
Supplement: MOESM2 [file 15246526]

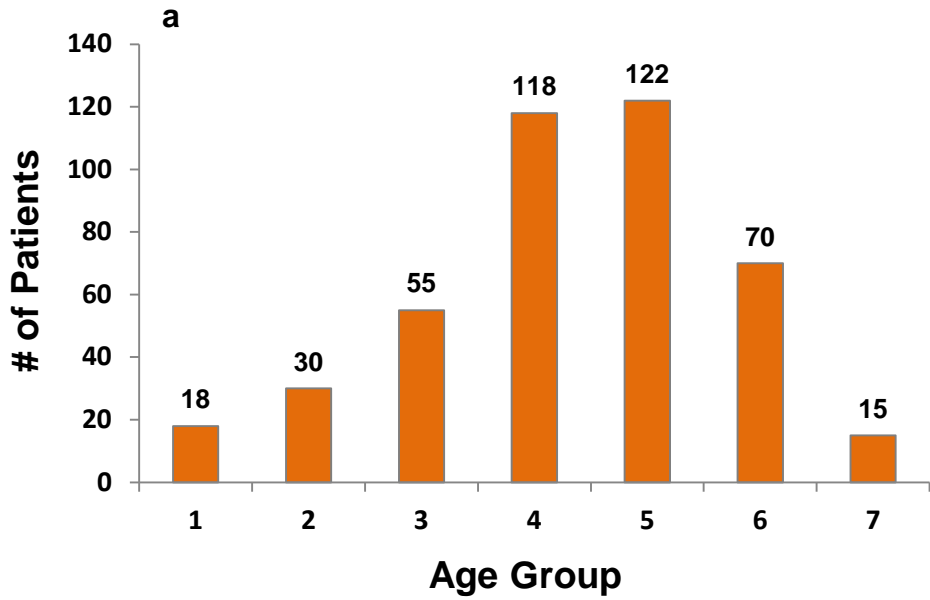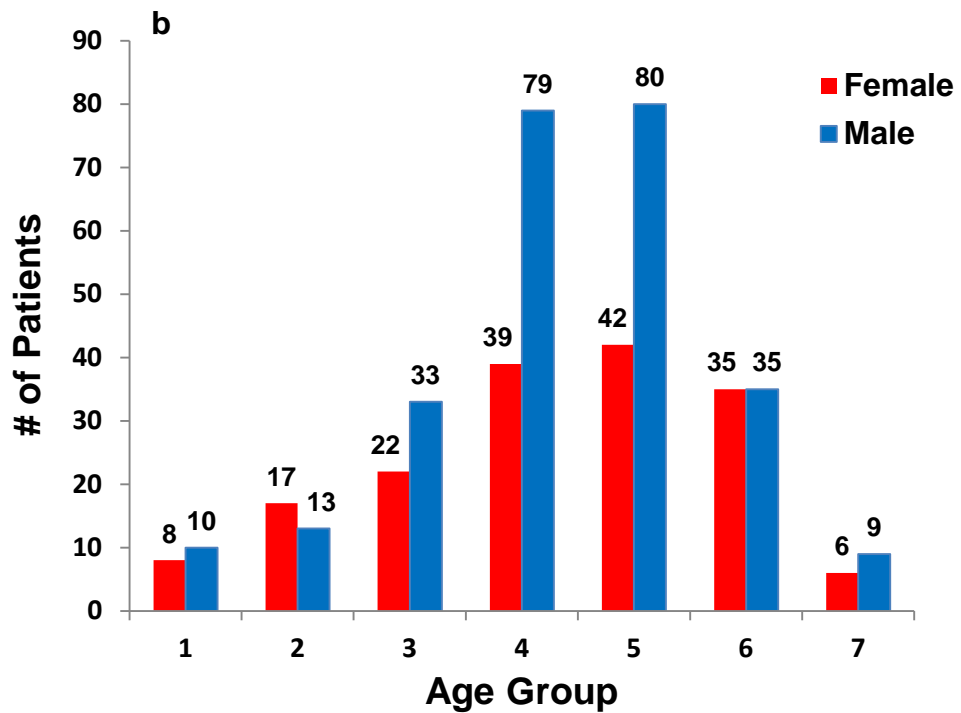

**Age Group:**

1. < 30 years

4. 50 ≤ and < 60

7. > 80

2. 30 ≤ and < 40

5. 60 ≤ and < 70

3. 40 ≤ and < 50

6. 70 ≤ and < 80

**Fig S1**

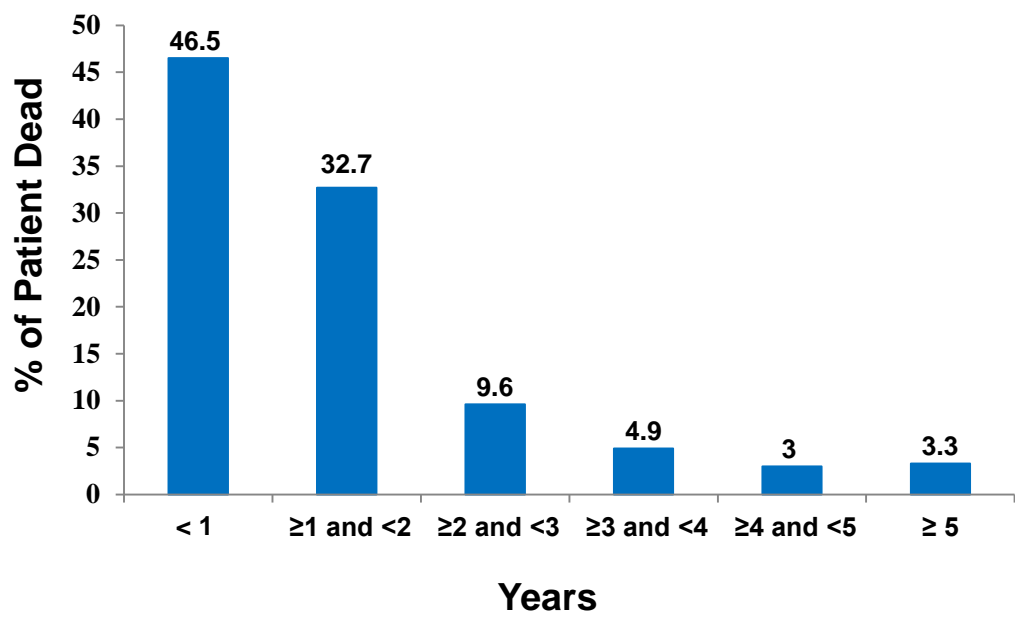

**Fig S2**

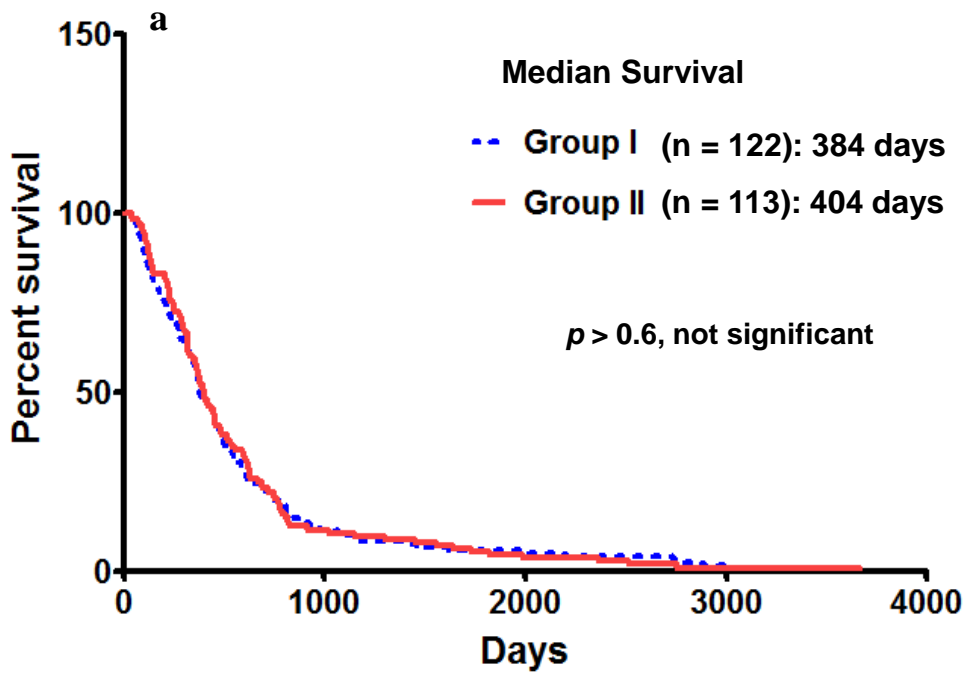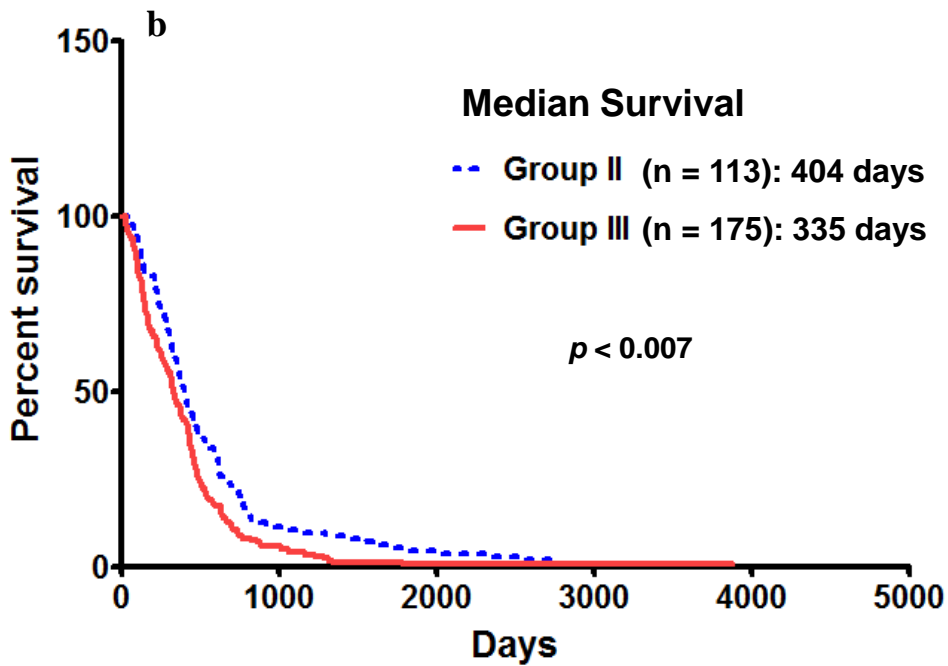

Fig S3

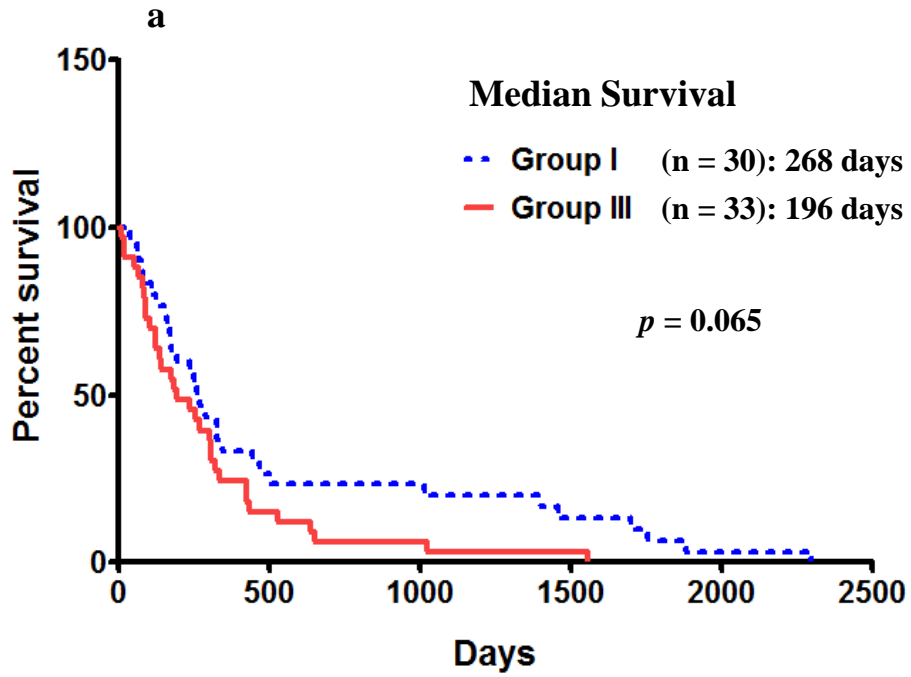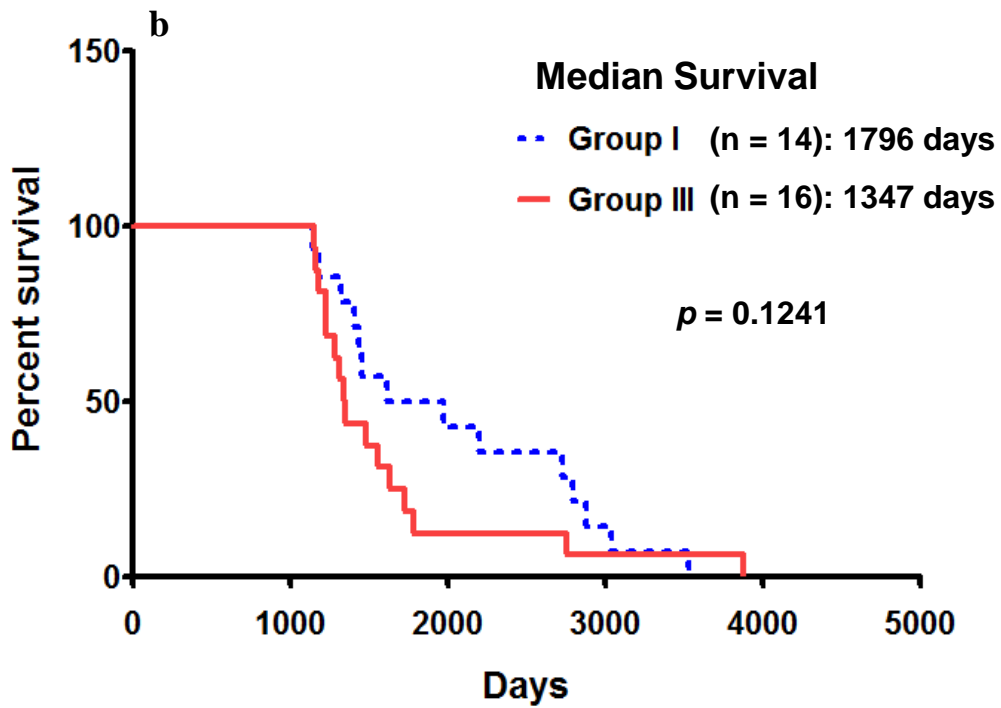

**Fig S4**

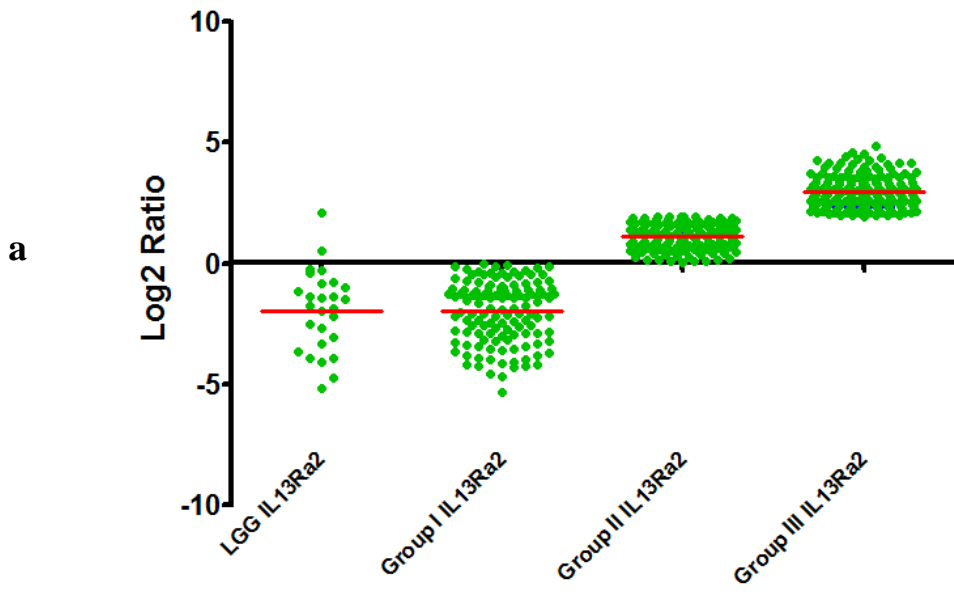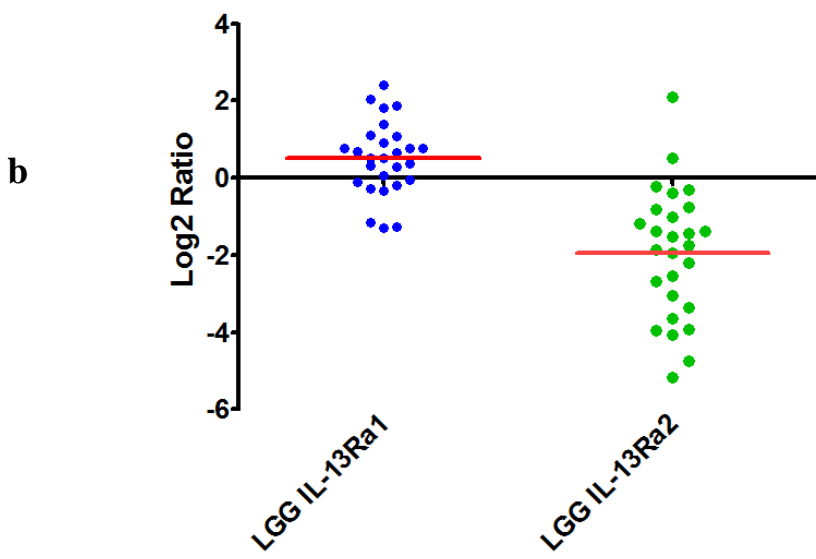

**Fig S5**

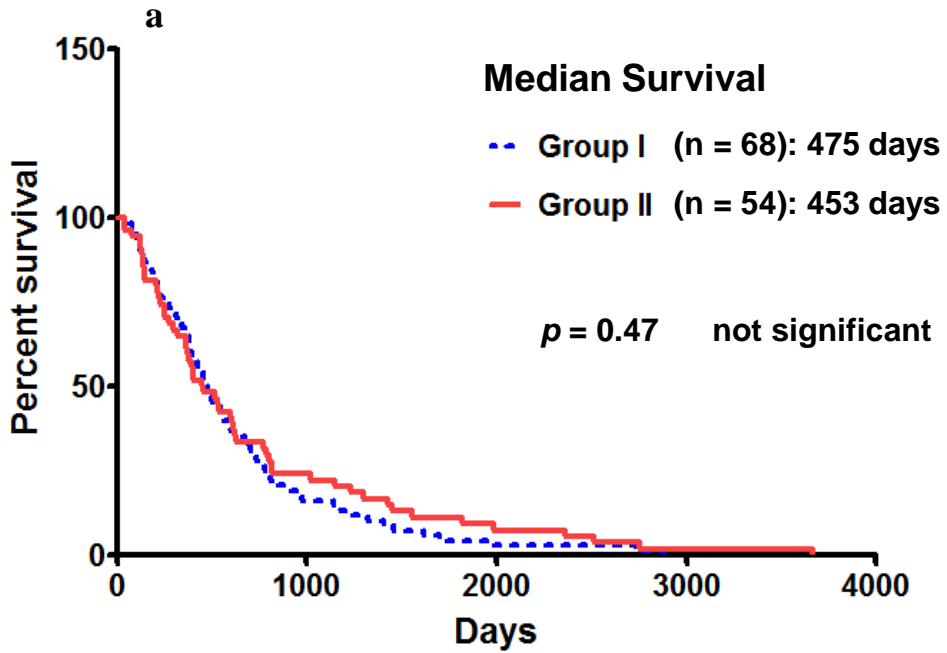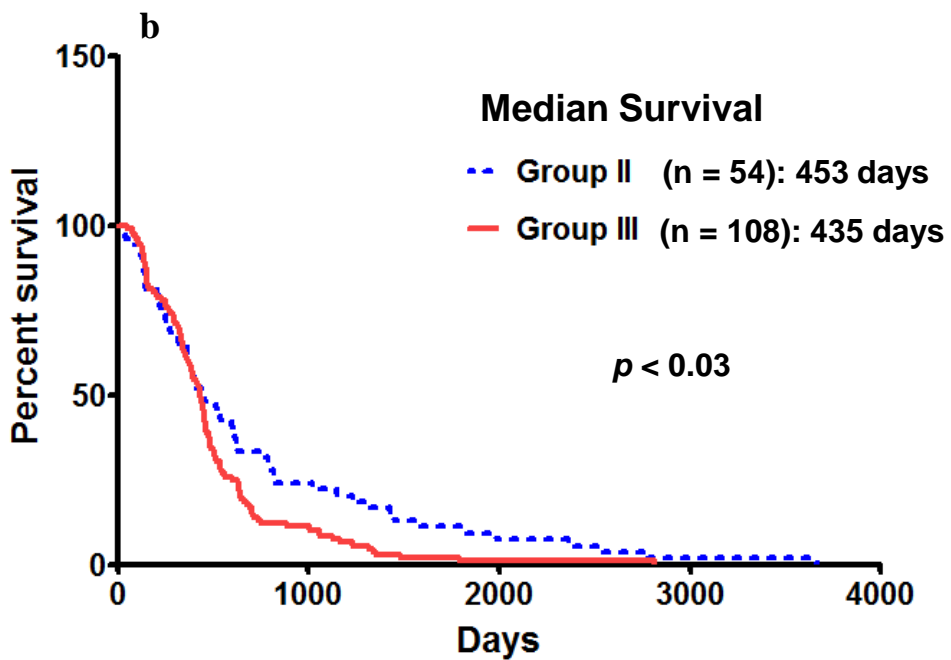

Fig S6

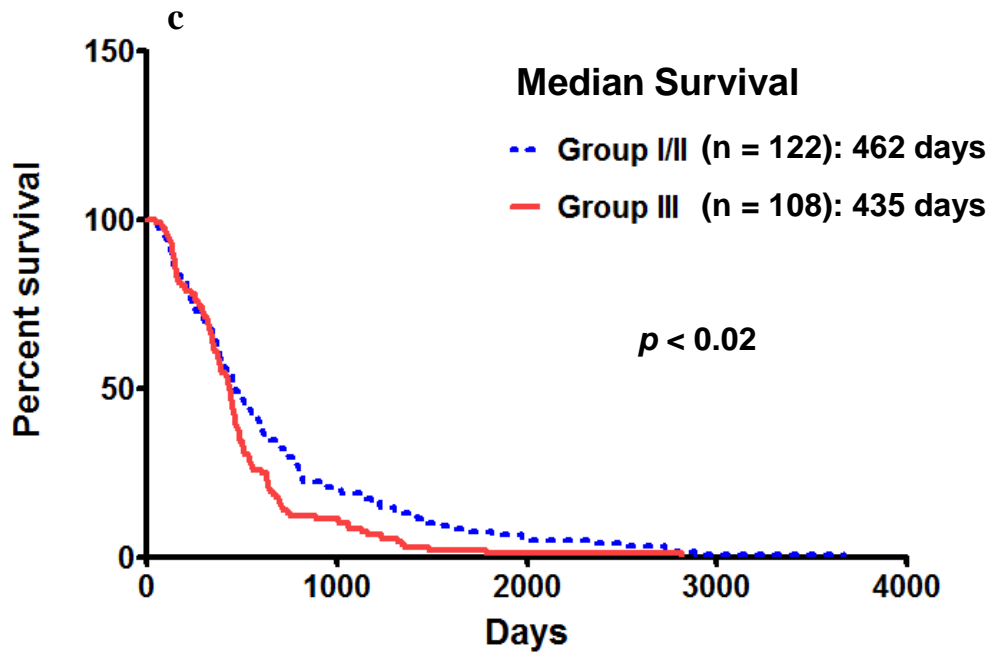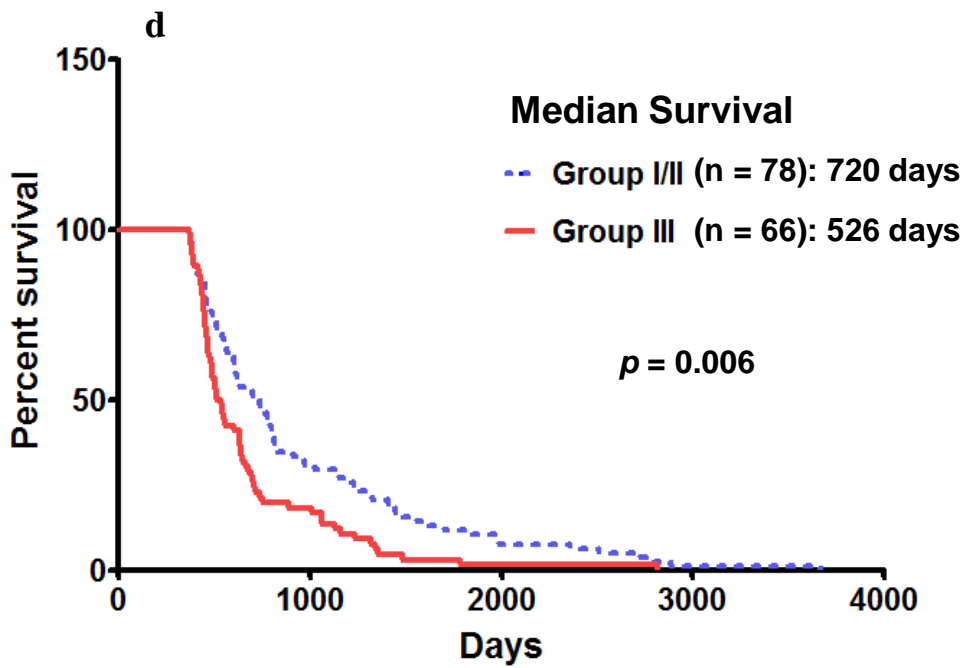

Fig S6

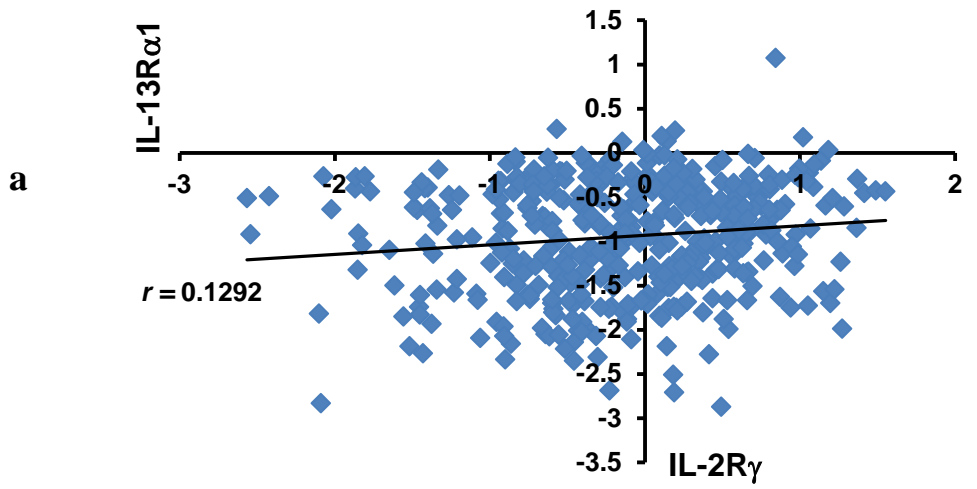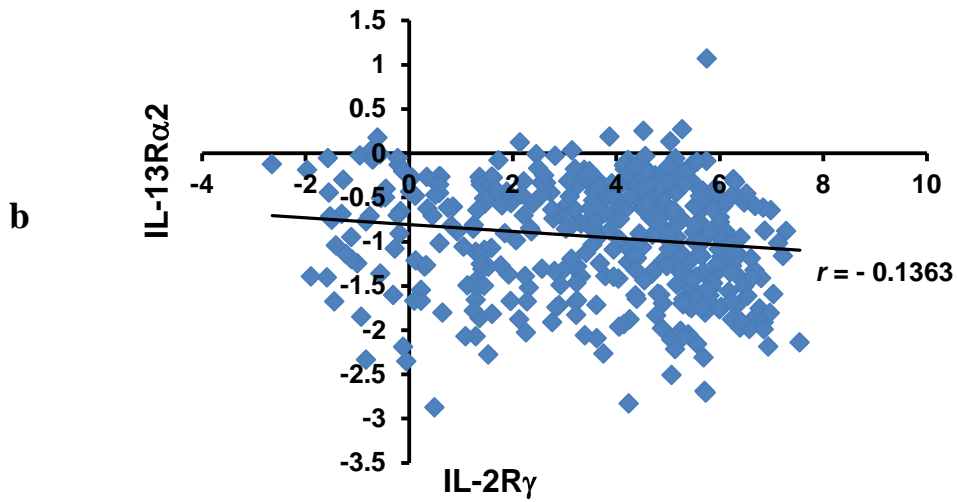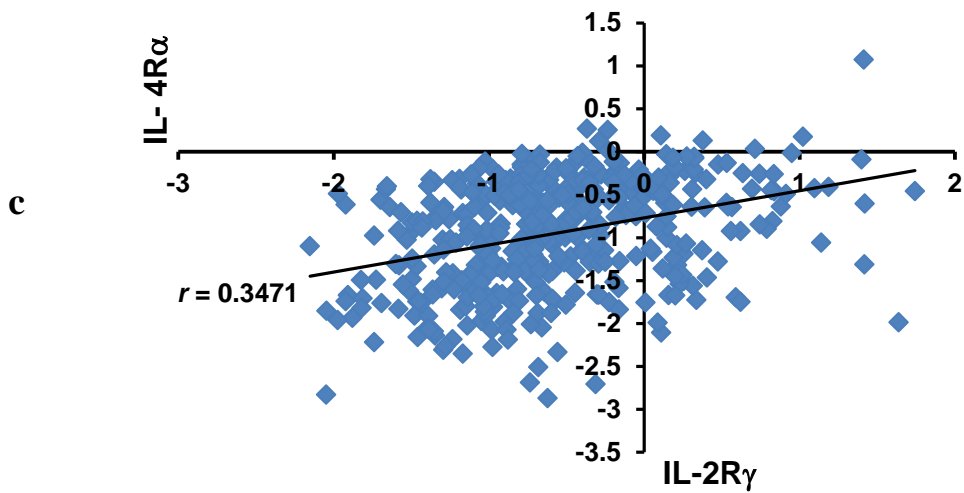

**Fig S7**



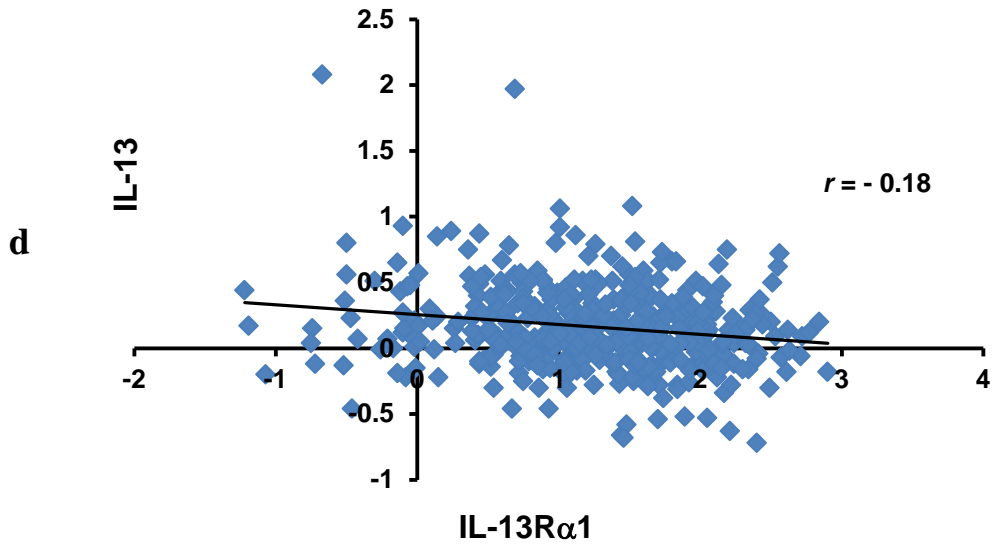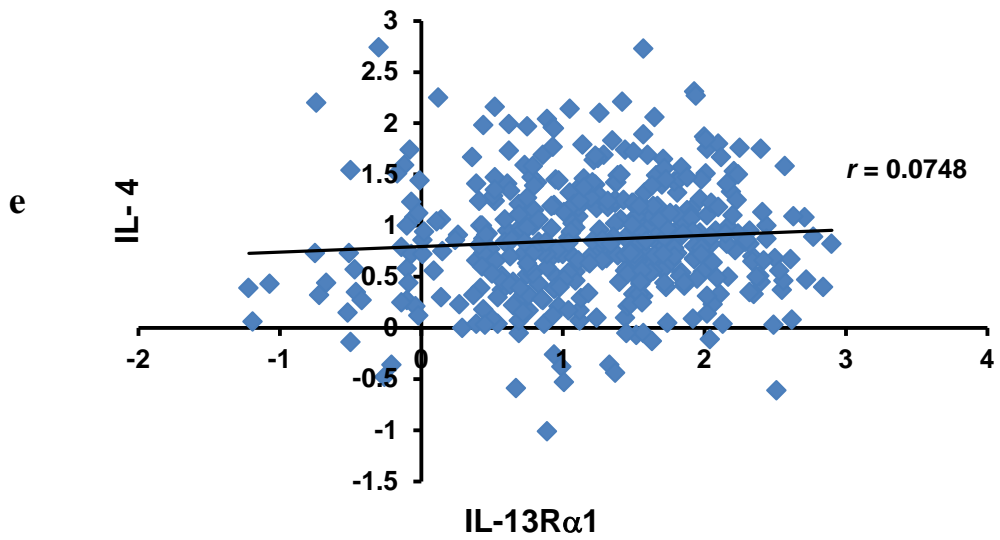

**Fig S7**

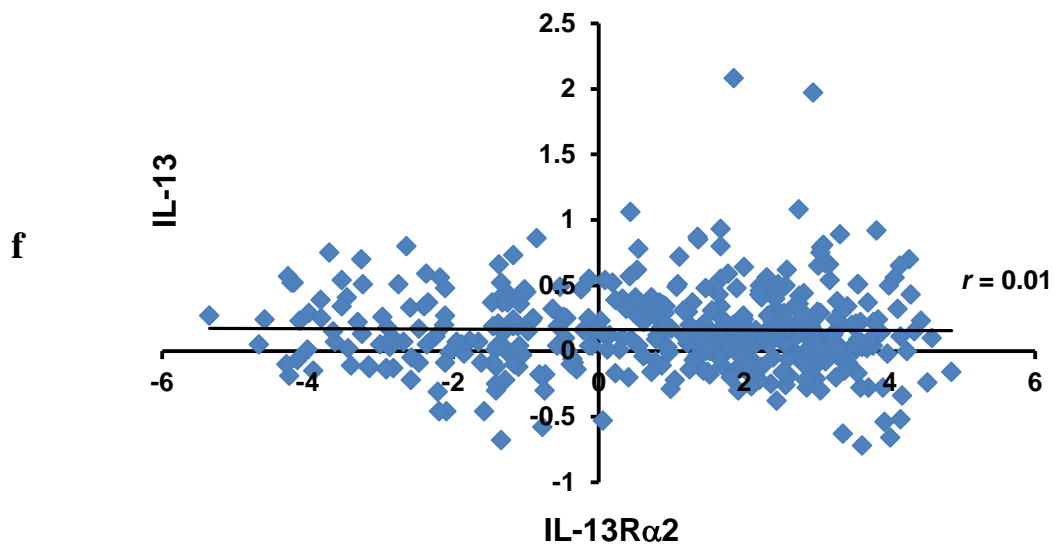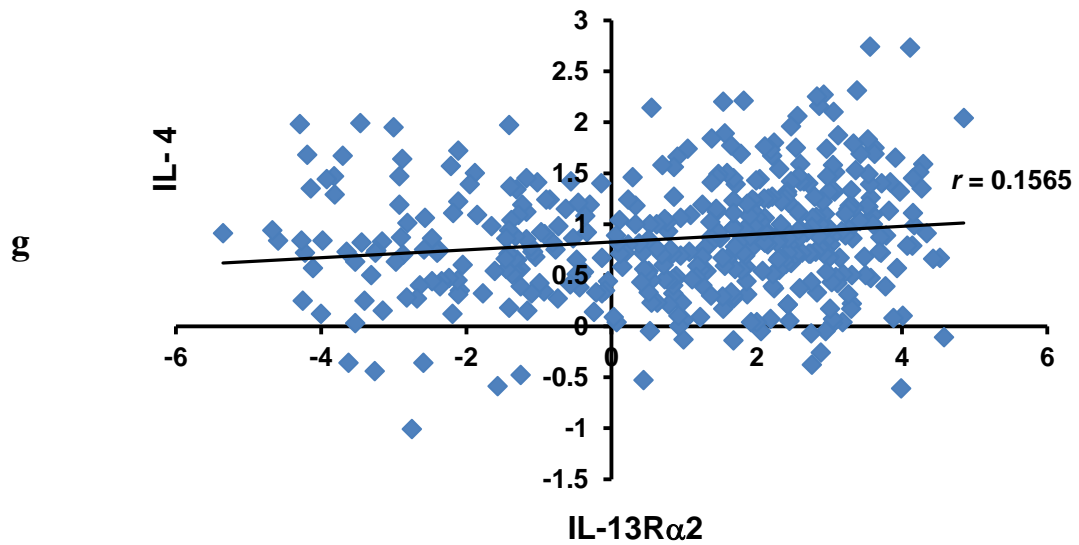

**Fig S7**

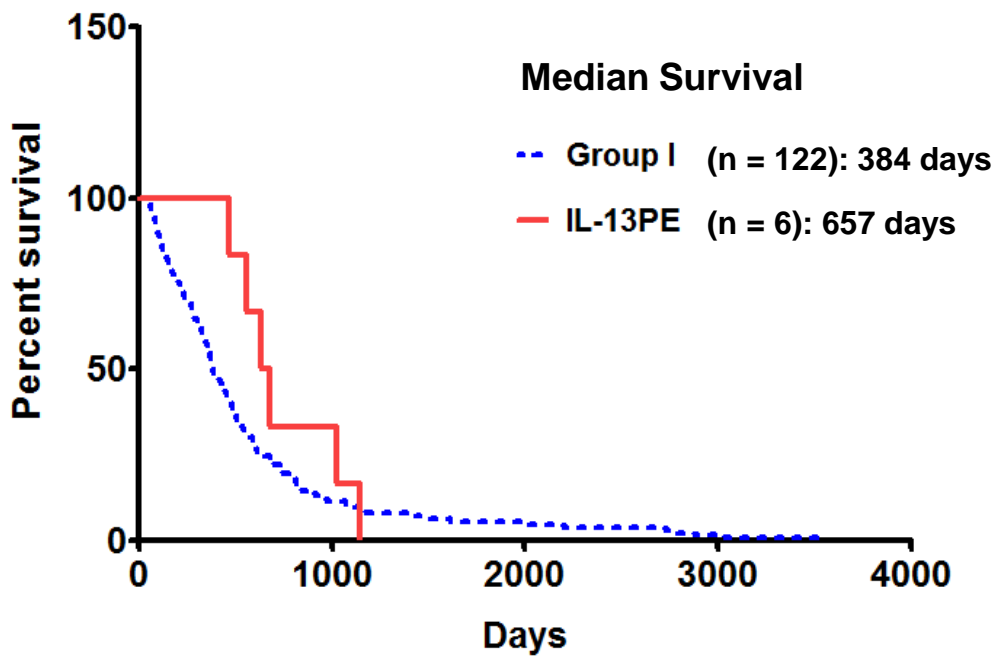

**Fig S8**

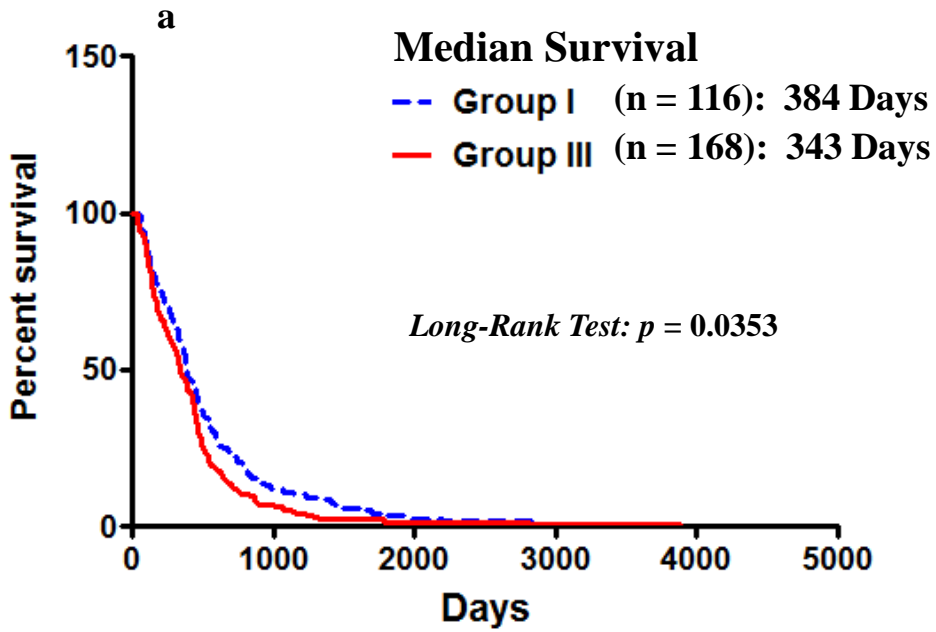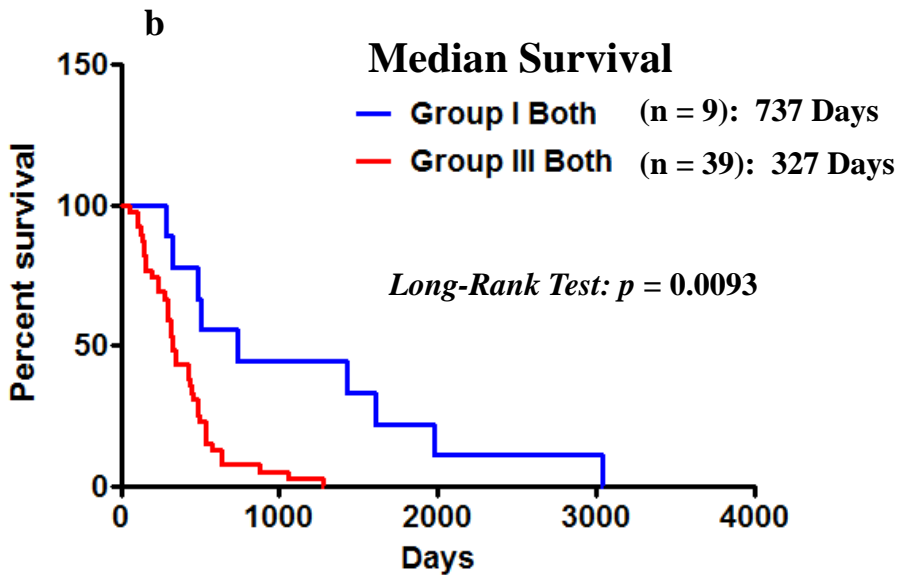

**Fig S9**
