# Supplementary material for: Analysis of the cancer genome atlas (TCGA) database identifies an inverse relationship between interleukin-13 receptor α1 and α2 gene expression and poor prognosis and drug resistance in subjects with glioblastoma multiforme
Source: Springer Nature journal article supplement (doi:10.1007/s11060-017-2680-9), 2017-11-22
Supplement: MOESM4 [file 15246526]

**Table S1: Immune related genes expressed only in IL-13R $\alpha$ 2 mRNA highly expressed GBM tumors (Group III)**

| <b>Gene Symbol</b> | <b>Gene Name</b>                                                    | <b>Log2 Ratio</b> |
|--------------------|---------------------------------------------------------------------|-------------------|
| <b>FMOD</b>        | fibromodulin                                                        | <b>1.92</b>       |
| <b>CXCL13</b>      | <i>chemokine (C-X-C motif) ligand 13</i>                            | <b>1.61</b>       |
| <b>MNDA</b>        | myeloid cell nuclear differentiation antigen                        | <b>1.58</b>       |
| <b>HLA-DRA</b>     | major histocompatibility complex, class II, DR alpha                | <b>1.52</b>       |
| <b>TLR8</b>        | toll-like receptor 8                                                | <b>1.50</b>       |
| <b>LY75</b>        | lymphocyte antigen 75                                               | <b>1.48</b>       |
| <b>IL15</b>        | interleukin 15                                                      | <b>1.48</b>       |
| <b>IL18</b>        | interleukin 18 (interferon-gamma-inducing factor)                   | <b>1.45</b>       |
| <b>CCR5</b>        | chemokine (C-C motif) receptor 5 (gene/pseudogene)                  | <b>1.43</b>       |
| <b>FCGR3A</b>      | Fc fragment of IgG, low affinity IIIa, receptor (CD16a)             | <b>1.41</b>       |
| <b>PLEK</b>        | pleckstrin                                                          | <b>1.38</b>       |
| <b>NOD2</b>        | nucleotide-binding oligomerization domain containing 2              | <b>1.38</b>       |
| <b>SLFN11</b>      | schlafen family member 11                                           | <b>1.37</b>       |
| <b>CCL2</b>        | chemokine (C-C motif) ligand 2                                      | <b>1.37</b>       |
| <b>ITGBL1</b>      | integrin, beta-like 1 (with EGF-like repeat domains)                | <b>1.36</b>       |
| <b>OSM</b>         | oncostatin M                                                        | <b>1.36</b>       |
| <b>WISP1</b>       | WNT1 inducible signaling pathway protein 1                          | <b>1.35</b>       |
| <b>TREM2</b>       | triggering receptor expressed on myeloid cells 2                    | <b>1.35</b>       |
| <b>BOC</b>         | Boc homolog (mouse)                                                 | <b>1.33</b>       |
| <b>SRGN</b>        | serglycin                                                           | <b>1.33</b>       |
| <b>HLA-DRB5</b>    | major histocompatibility complex, class II, DR beta 5               | <b>1.33</b>       |
| <b>GJB6</b>        | gap junction protein, beta 6, 30kDa                                 | <b>1.33</b>       |
| <b>HLA-DOA</b>     | major histocompatibility complex, class II, DO alpha                | <b>1.32</b>       |
| <b>PARVG</b>       | parvin, gamma                                                       | <b>1.31</b>       |
| <b>FCER1G</b>      | Fc fragment of IgE, high affinity I, receptor for gamma polypeptide | <b>1.27</b>       |
| <b>MMRN1</b>       | multimerin 1                                                        | <b>1.25</b>       |
| <b>SIGLEC10</b>    | sialic acid binding Ig-like lectin 10                               | <b>1.25</b>       |
| <b>FYB</b>         | FYN binding protein                                                 | <b>1.25</b>       |
| <b>HOXB4</b>       | homeobox B4                                                         | <b>1.24</b>       |
| <b>PLA2G4A</b>     | phospholipase A2, group IVA                                         | <b>1.23</b>       |
| <b>IL17B</b>       | interleukin 17B                                                     | <b>1.23</b>       |
| <b>TLR6</b>        | toll-like receptor 6                                                | <b>1.23</b>       |
| <b>TLR5</b>        | toll-like receptor 5                                                | <b>1.23</b>       |
| <b>CLEC7A</b>      | C-type lectin domain family 7, member A                             | <b>1.22</b>       |
| <b>AIF1</b>        | allograft inflammatory factor 1                                     | <b>1.21</b>       |
| <b>HLA-DQA1</b>    | major histocompatibility complex, class II, DQ alpha 1              | <b>1.21</b>       |

|                 |                                                                            |             |
|-----------------|----------------------------------------------------------------------------|-------------|
| <b>PRPH2</b>    | peripherin 2 (retinal degeneration, slow)                                  | <b>1.21</b> |
| <b>FOXJ1</b>    | forkhead box J1                                                            | <b>1.20</b> |
| <b>TSPO</b>     | translocator protein (18kDa)                                               | <b>1.20</b> |
| <b>GZMK</b>     | granzyme K (granzyme 3; tryptase II)                                       | <b>1.20</b> |
| <b>THBD</b>     | thrombomodulin                                                             | <b>1.19</b> |
| <b>SULF1</b>    | sulfatase 1                                                                | <b>1.18</b> |
| <b>ELMOD2</b>   | ELMO/CED-12 domain containing 2                                            | <b>1.18</b> |
| <b>MFAP4</b>    | microfibrillar-associated protein 4                                        | <b>1.17</b> |
| <b>IFI6</b>     | interferon, alpha-inducible protein 6                                      | <b>1.17</b> |
| <b>AIM2</b>     | aminoacyl tRNA synthetase complex-interacting<br>multifunctional protein 2 | <b>1.17</b> |
| <b>DDIT3</b>    | DNA-damage-inducible transcript 3                                          | <b>1.17</b> |
| <b>BTG3</b>     | B-cell translocation gene 3                                                | <b>1.16</b> |
| <b>TBX21</b>    | T-box 21                                                                   | <b>1.15</b> |
| <b>SERPING1</b> | serpin peptidase inhibitor, clade G (C1 inhibitor), member 1               | <b>1.15</b> |
| <b>SYK</b>      | spleen tyrosine kinase                                                     | <b>1.14</b> |
| <b>HLA-DQB1</b> | major histocompatibility complex, class II, DQ beta 1                      | <b>1.13</b> |
| <b>VDR</b>      | vitamin D (1,25- dihydroxyvitamin D3) receptor                             | <b>1.13</b> |
| <b>CSF3R</b>    | colony stimulating factor 3 receptor (granulocyte)                         | <b>1.13</b> |
| <b>C1S</b>      | complement component 1, s subcomponent                                     | <b>1.13</b> |
| <b>CD1D</b>     | CD1d molecule                                                              | <b>1.12</b> |
| <b>TGFBR1</b>   | transforming growth factor, beta receptor 1                                | <b>1.12</b> |
| <b>PSMB10</b>   | proteasome (prosome, macropain) subunit, beta type, 10                     | <b>1.12</b> |
| <b>SPI1</b>     | spleen focus forming virus (SFFV) proviral integration<br>oncogene spi1    | <b>1.11</b> |
| <b>SIPA1</b>    | signal-induced proliferation-associated 1                                  | <b>1.11</b> |
| <b>CIITA</b>    | class II, major histocompatibility complex, transactivator                 | <b>1.11</b> |
| <b>LILRB1</b>   | leukocyte immunoglobulin-like receptor, subfamily B 1                      | <b>1.11</b> |
| <b>HES1</b>     | hairy and enhancer of split 1, (Drosophila)                                | <b>1.11</b> |
| <b>TNFRSF14</b> | tumor necrosis factor receptor superfamily, member 14                      | <b>1.11</b> |
| <b>TIPARP</b>   | TCDD-inducible poly(ADP-ribose) polymerase                                 | <b>1.10</b> |
| <b>LCP2</b>     | lymphocyte cytosolic protein 2                                             | <b>1.10</b> |
| <b>FXYD5</b>    | FXYD domain containing ion transport regulator 5                           | <b>1.10</b> |
| <b>FPR1</b>     | formyl peptide receptor 1                                                  | <b>1.10</b> |
| <b>CFD</b>      | complement factor D (adipsin)                                              | <b>1.10</b> |
| <b>ATF5</b>     | activating transcription factor 5                                          | <b>1.10</b> |
| <b>PSMB8</b>    | proteasome (prosome, macropain) subunit, beta type, 8                      | <b>1.10</b> |
| <b>ANXA4</b>    | annexin A14                                                                | <b>1.09</b> |
| <b>IFT20</b>    | intraflagellar transport 20 homolog (Chlamydomonas)                        | <b>1.09</b> |
| <b>LCP1</b>     | lymphocyte cytosolic protein 1 (L-plastin)                                 | <b>1.09</b> |
| <b>CFH</b>      | complement factor H                                                        | <b>1.09</b> |
| <b>IGSF5</b>    | immunoglobulin superfamily, member 5                                       | <b>1.08</b> |
| <b>SELL</b>     | selectin L                                                                 | <b>1.08</b> |

|                 |                                                                     |             |
|-----------------|---------------------------------------------------------------------|-------------|
| <b>OXTR</b>     | oxytocin receptor                                                   | <b>1.08</b> |
| <b>IL33</b>     | interleukin 33                                                      | <b>1.08</b> |
| <b>CD226</b>    | CD226 molecule                                                      | <b>1.08</b> |
| <b>F3</b>       | coagulation factor III (thromboplastin, tissue factor)              | <b>1.07</b> |
| <b>CFLAR</b>    | CASP8 and FADD-like apoptosis regulator                             | <b>1.07</b> |
| <b>F11R</b>     | F11 receptor                                                        | <b>1.07</b> |
| <b>SLFN13</b>   | schlafen family member 13                                           | <b>1.07</b> |
| <b>CD84</b>     | CD84 molecule                                                       | <b>1.07</b> |
| <b>TMEM173</b>  | transmembrane protein 173                                           | <b>1.06</b> |
| <b>HMHA1</b>    | histocompatibility (minor) HA-1                                     | <b>1.06</b> |
| <b>HSPB1</b>    | heat shock 27kDa protein 1                                          | <b>1.05</b> |
| <b>TNFAIP3</b>  | tumor necrosis factor, alpha-induced protein 3                      | <b>1.05</b> |
| <b>A2M</b>      | alpha-2-macroglobulin                                               | <b>1.05</b> |
| <b>CD37</b>     | CD37 molecule                                                       | <b>1.04</b> |
| <b>LAMP2</b>    | lysosomal-associated membrane protein 2                             | <b>1.04</b> |
| <b>NRP2</b>     | neuropilin 2                                                        | <b>1.03</b> |
| <b>IL7R</b>     | interleukin 7 receptor                                              | <b>1.03</b> |
| <b>AMICA1</b>   | adhesion molecule, interacts with CXADR antigen 1                   | <b>1.03</b> |
| <b>NRP1</b>     | neuropilin 1                                                        | <b>1.03</b> |
| <b>BCAP29</b>   | B-cell receptor-associated protein 29                               | <b>1.03</b> |
| <b>IFI35</b>    | interferon-induced protein 35                                       | <b>1.02</b> |
| <b>FLI1</b>     | Friend leukemia virus integration 1                                 | <b>1.02</b> |
| <b>MAGED1</b>   | melanoma antigen family D, 1                                        | <b>1.02</b> |
| <b>IFT52</b>    | intraflagellar transport 52 homolog (Chlamydomonas)                 | <b>1.02</b> |
| <b>CD276</b>    | CD276 molecule                                                      | <b>1.02</b> |
| <b>TBXAS1</b>   | thromboxane A synthase 1 (platelet)                                 | <b>1.02</b> |
| <b>RRAD</b>     | Ras-related associated with diabetes                                | <b>1.01</b> |
| <b>CXCR4</b>    | chemokine (C-X-C motif) receptor 4                                  | <b>1.01</b> |
| <b>CD86</b>     | CD86 molecule                                                       | <b>1.01</b> |
| <b>EMILIN1</b>  | elastin microfibril interfacier 1                                   | <b>1.00</b> |
| <b>FCER1A</b>   | Fc fragment of IgE, high affinity I, receptor for alpha polypeptide | <b>1.00</b> |
| <b>IL20RB</b>   | interleukin 20 receptor beta                                        | <b>1.00</b> |
| <b>IRF7</b>     | interferon regulatory factor 7                                      | <b>0.99</b> |
| <b>TNFRSF1B</b> | tumor necrosis factor receptor superfamily, member 1B               | <b>0.99</b> |
| <b>PLCG2</b>    | phospholipase C, gamma 2 (phosphatidylinositol-specific)            | <b>0.98</b> |
| <b>IL4</b>      | interleukin 4                                                       | <b>0.98</b> |
| <b>CFB</b>      | complement factor B                                                 | <b>0.98</b> |
| <b>TBX5</b>     | T-box 5                                                             | <b>0.98</b> |
| <b>FCN3</b>     | ficolin (collagen/fibrinogen domain containing) 3                   | <b>0.97</b> |
| <b>PRAM1</b>    | PML-RARA regulated adaptor molecule 1                               | <b>0.97</b> |
| <b>IL18RAP</b>  | interleukin 18 receptor accessory protein                           | <b>0.97</b> |
| <b>CPA3</b>     | carboxypeptidase A3 (mast cell)                                     | <b>0.96</b> |

|                 |                                                              |             |
|-----------------|--------------------------------------------------------------|-------------|
| <b>SHFM1</b>    | split hand/foot malformation (ectrodactyly) type 1           | <b>0.96</b> |
| <b>DPP4</b>     | dipeptidyl-peptidase 4                                       | <b>0.96</b> |
| <b>SERPINI2</b> | serpin peptidase inhibitor, clade I (pancpin), member 2      | <b>0.96</b> |
| <b>RHCE</b>     | Rh blood group, CcEe antigens                                | <b>0.96</b> |
| <b>KCNJ8</b>    | potassium inwardly-rectifying channel, subfamily J, member 8 | <b>0.96</b> |
| <b>COL9A1</b>   | collagen, type IX, alpha 1                                   | <b>0.95</b> |
| <b>CD164</b>    | CD164 molecule, sialomucin                                   | <b>0.95</b> |
| <b>DUSP6</b>    | dual specificity phosphatase 6                               | <b>0.95</b> |
| <b>IFNAR1</b>   | interferon (alpha, beta and omega) receptor 1                | <b>0.95</b> |
| <b>IRAK3</b>    | interleukin-1 receptor-associated kinase 3                   | <b>0.95</b> |
| <b>LST1</b>     | leukocyte specific transcript 1                              | <b>0.95</b> |
| <b>ICAM1</b>    | intercellular adhesion molecule 1                            | <b>0.95</b> |

---

\*Log2 ratios are the mean values of immune related genes expressed in IL-13R $\alpha$ 2 highly expressed tumor group (Group III).
